# Supplementary material
Source: publisher site journal article supplement (https://www.dovepress.com/article/284520)
Supplement: Supplementary file 1 [file get_supplementary_file.php]

**Supporting Information**

**Facile Synthesis of Melanin-Dye Nanoagent for NIR-II Fluorescence/Photoacoustic Imaging-Guided Photothermal Therapy**

Jinghua Suna, Wenwen Caia, Yao Sunb, Chunyan Guoa and Ruiping Zhanga*

a Center for Translational Medicine Research, Shanxi Medical University, Imaging Department, The Affiliated Bethune Hospital of Shanxi Medical University, Taiyuan 030001, China

b Key Laboratory of Pesticides and Chemical Biology, Ministry of Education, College of Chemistry, Central China Normal University, Wuhan 430079, China

* E-mail: zrp_7142@sxmu.edu.cn

Jinghua Sun, Wenwen Cai and Yao Sun were contributed equally to this work.


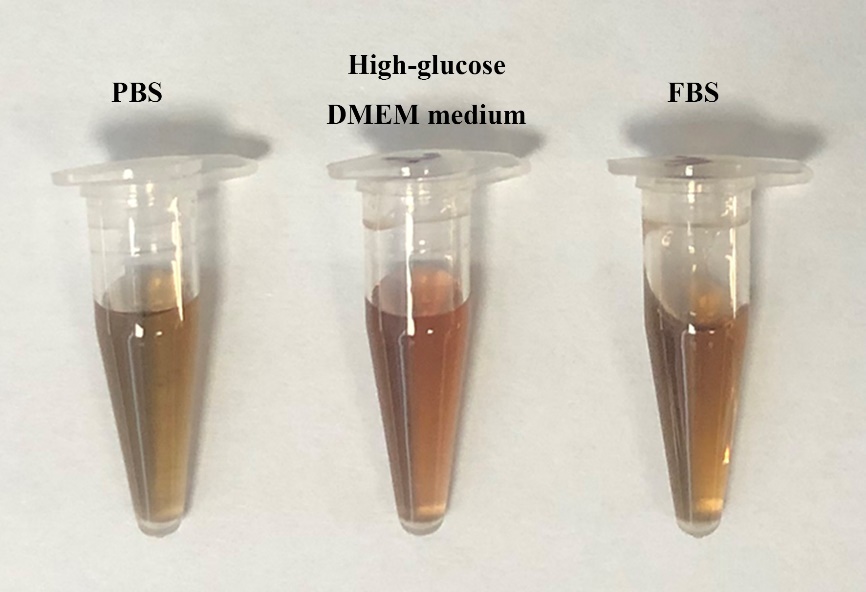


**Figure S1.** The stability result of MNPH2 in different medium after 48 h incubation.


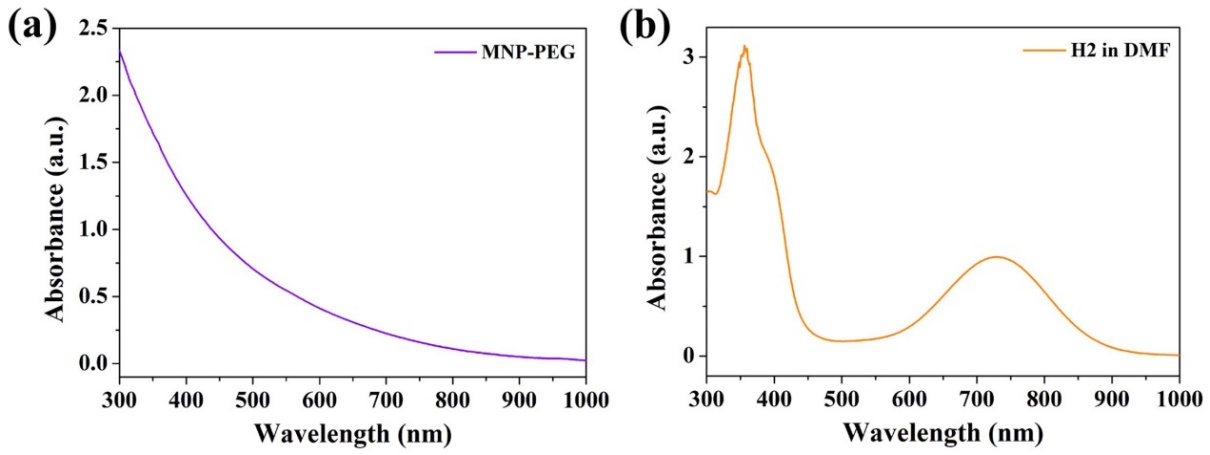


**Figure S2**. UV-vis-NIR absorbance spectra of MNP-PEG in DI and H2 in DMF.


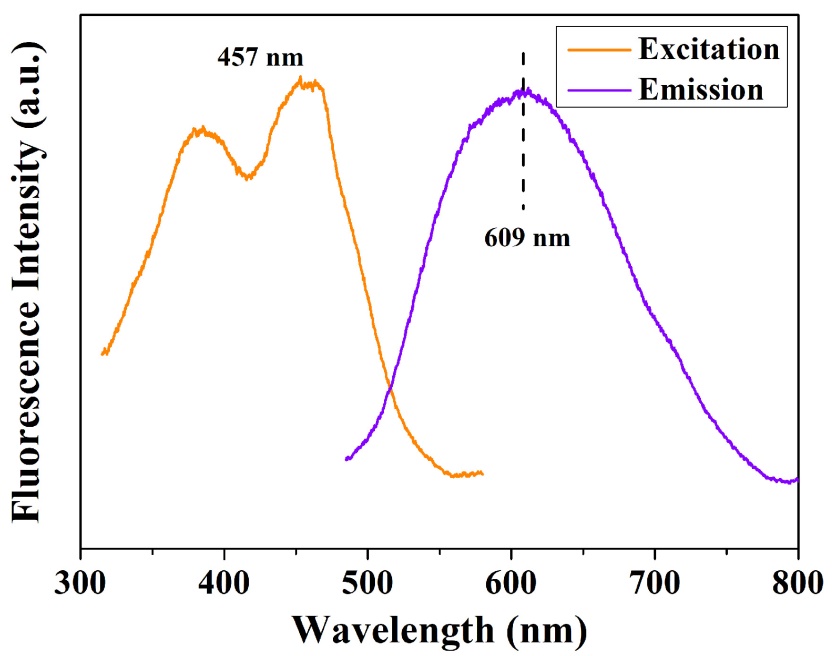


**Figure S3.** Fluorescent excitation and emission spectrum of MNPH2 aqueous solution in the visible region.


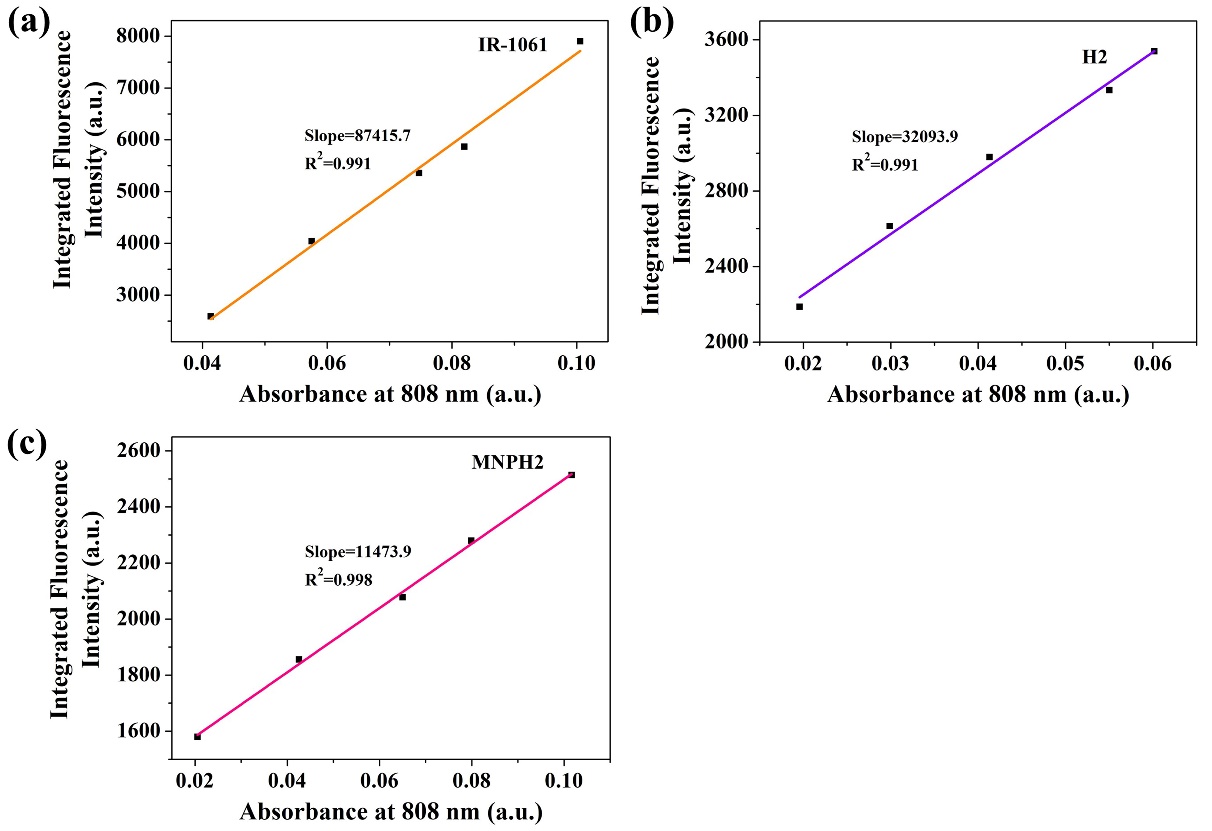


**Figure S4.** Fluorescence quantum yield measurements. The integrated fluorescence was plotted against absorbance for both IR1061 in dichloromethane (a), H2 in DMF (b), and MNPH2 in water fitted into a linear function. The quantum yield was calculated in the following manner:

**
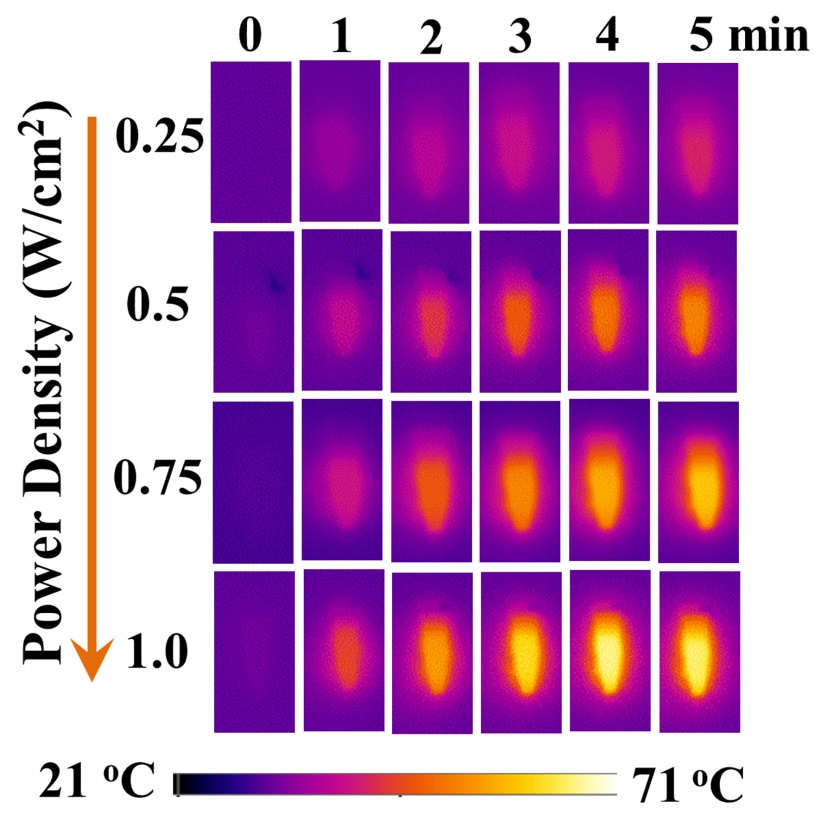
**

**Figure S5.** Power density-dependent thermal images of MNPH2 solution within 5 min at a concentration of 100 μg/mL.


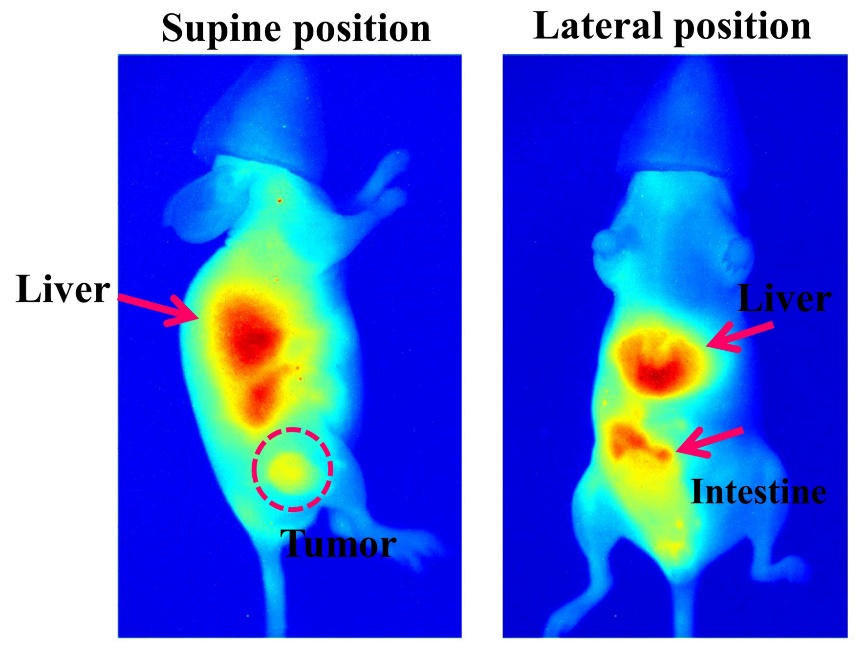


**Figure S6.** The whole-body NIR-Ⅱ fluorescent images of mice in the lateral and supine position at 8 h.


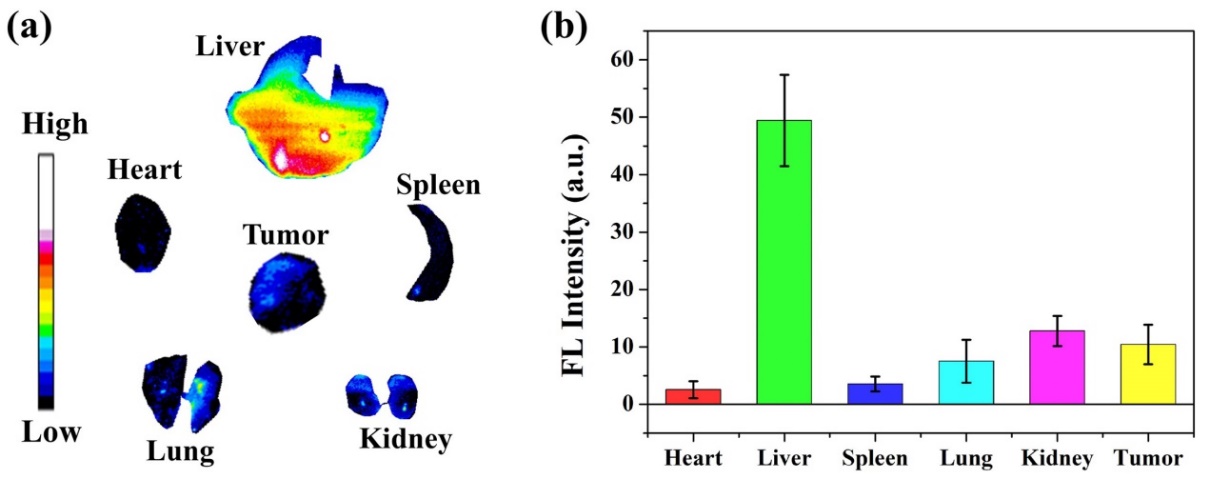


**Figure S7.** (a) NIR-Ⅱ fluorescence images of the tumor and major organs (heart, liver, spleen, lung, kidney) ex vivo. (b) Quantitative NIR-Ⅱ fluorescence intensities in tumor area and other major organs.


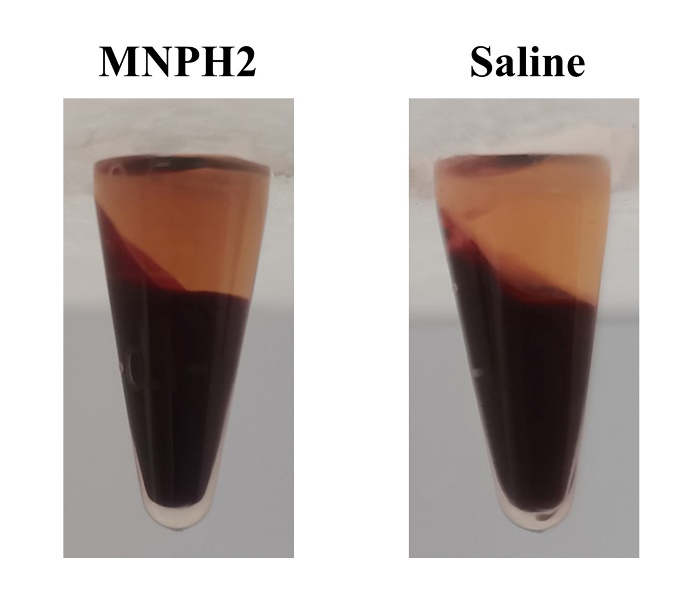


**Figure S8.** Hemolysis photos after centrifugation of MNPH2 incubated with blood cells for 2 h, using saline as a negative control.
